# Supplementary material
Source: PubMed Central journal article supplement (PMC124383)

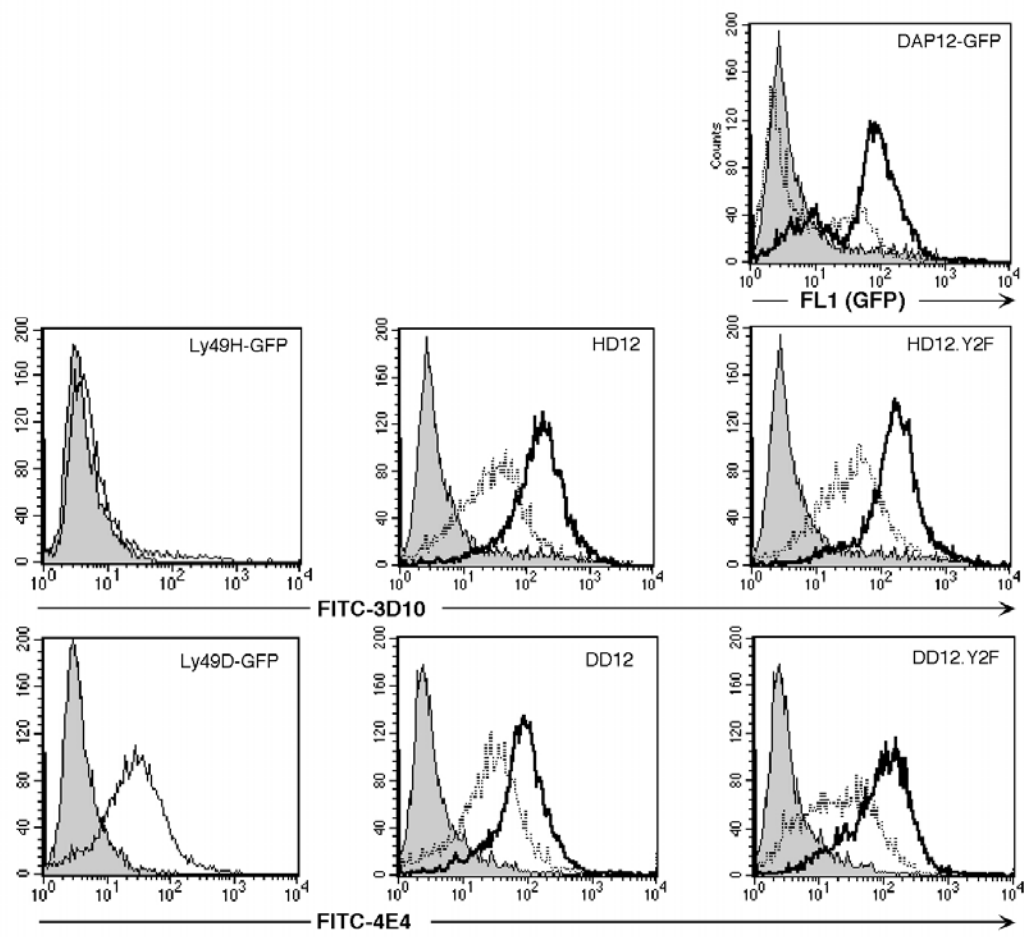

Supplement: pnas_092258599_5.pdf [file pnas_092258599_5.pdf]

**A**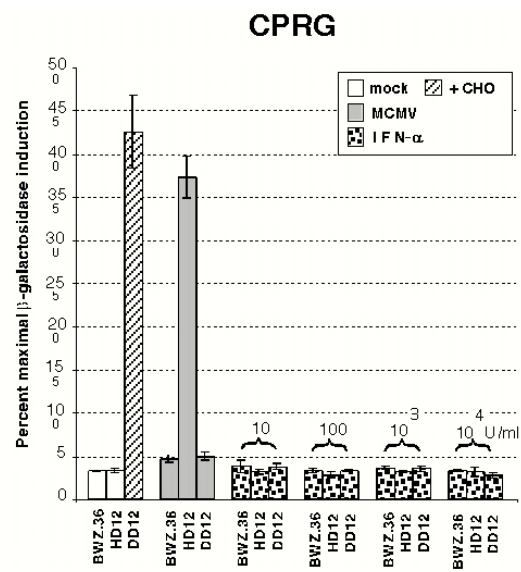**X-Gal**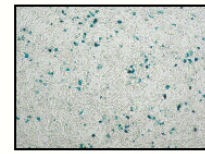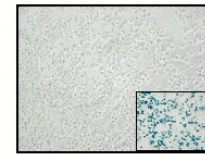**B**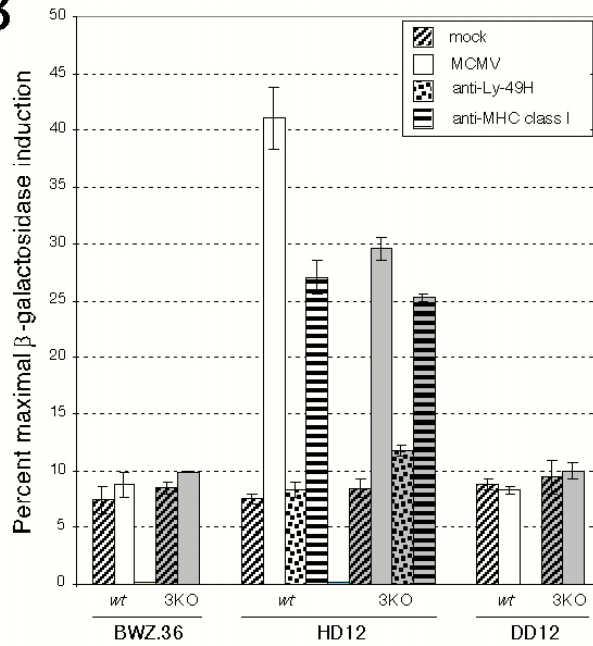**C**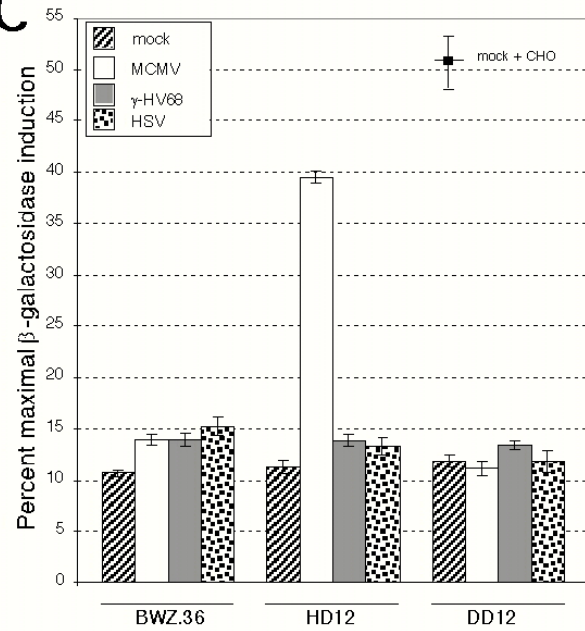

Supplement: pnas_092258599_6.pdf [file pnas_092258599_6.pdf]

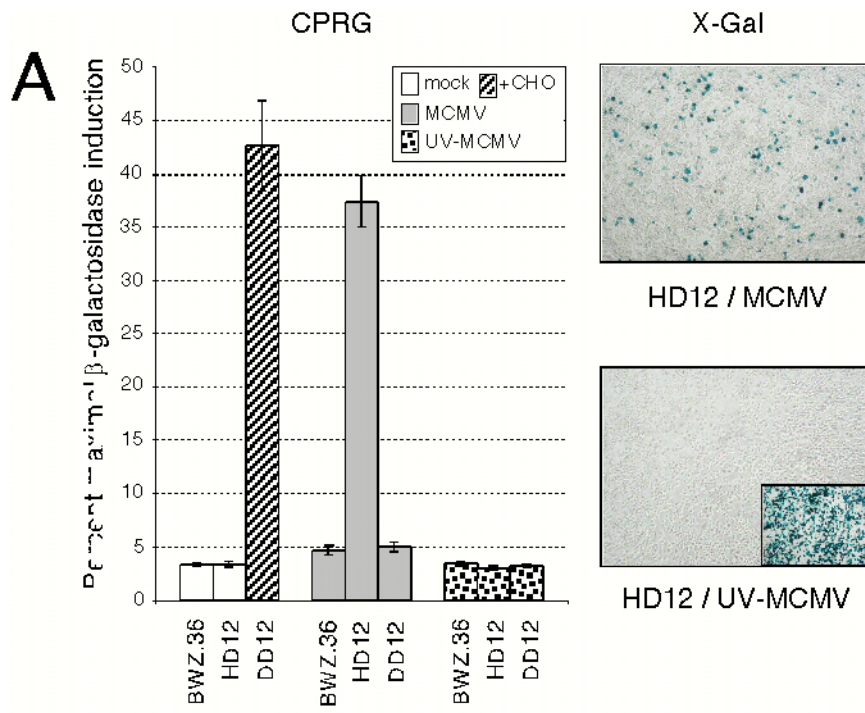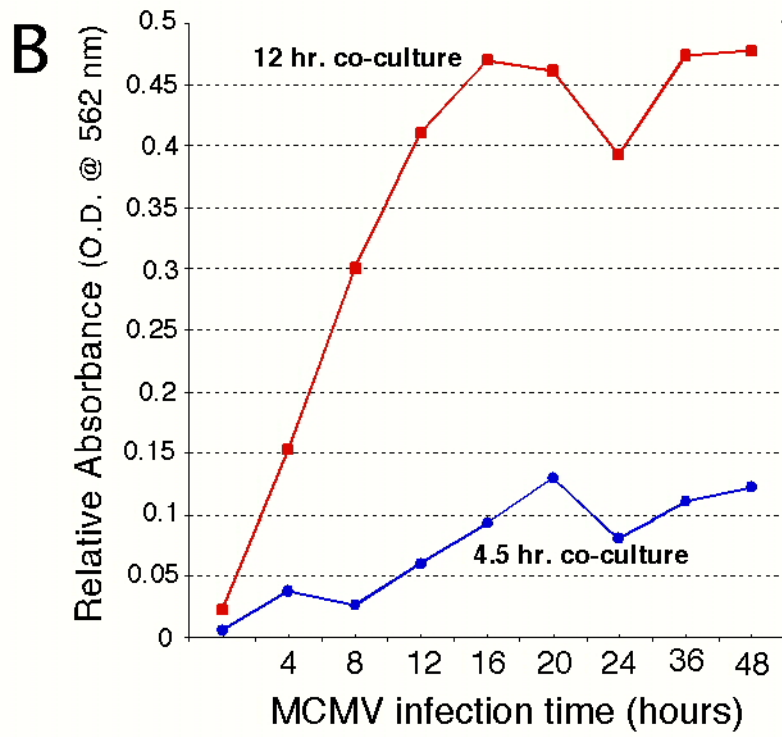

Supplement: pnas_092258599_7.pdf [file pnas_092258599_7.pdf]
